# Supplementary material for: Uncertainties in the Emissions Database for Global Atmospheric Research (EDGAR) emission inventory of greenhouse gases
Source: Copernicus journal article supplement (doi:10.5194/acp-21-5655-2021), 2021-04-14
Supplement: Supplementary file 1 [file acp-21-5655-2021-supplement.pdf]

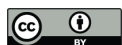

*Supplement of*

## **Uncertainties in the Emissions Database for Global Atmospheric Research (EDGAR) emission inventory of greenhouse gases**

**Efisio Solazzo et al.**

*Correspondence to:* Efisio Solazzo ([efisio.solazzo@ext.ec.europa.eu](mailto:efisio.solazzo@ext.ec.europa.eu))

The copyright of individual parts of the supplement might differ from the article licence.

## SUPPLEMENTARY

**TABLE S1. COUNTRY CODES, NAMES AND DEVELOPMENT STATUS (DEVELOPING AND INDUSTRIALISED). THE TABLE IS EXTRACTED FROM TABLE S1 OF JANSSENS-MAENHOUT ET AL. (2019) (AVAILABLE AT: [HTTPS://DOI.ORG/10.5194/ESSD-11-959-2019-SUPPLEMENT](https://doi.org/10.5194/essd-11-959-2019-supplement)).**

| Country code | ISO | Country name         | Country class  |
|--------------|-----|----------------------|----------------|
| ABW          |     | Aruba                | Developing     |
| AFG          |     | Afghanistan          | Developing     |
| AGO          |     | Angola               | Developing     |
| AIA          |     | Anguilla             | Developing     |
| AIR          |     | Int. Aviation        | 0              |
| ALB          |     | Albania              | Industrialised |
| ANT          |     | Netherlands Antilles | Developing     |
| ARE          |     | United Arab Emirates | Developing     |
| ARG          |     | Argentina            | Developing     |
| ARM          |     | Armenia              | Industrialised |
| ASM          |     | American Samoa       | Developing     |
| ATG          |     | Antigua and Barbuda  | Developing     |
| AUS          |     | Australia            | Industrialised |
| AUT          |     | Austria              | Industrialised |
| AZE          |     | Azerbaijan           | Industrialised |
| BDI          |     | Burundi              | Developing     |
| BEL          |     | Belgium              | Industrialised |
| BEN          |     | Benin                | Developing     |
| BFA          |     | Burkina Faso         | Developing     |
| BGD          |     | Bangladesh           | Developing     |
| BGR          |     | Bulgaria             | Industrialised |
| BHR          |     | Bahrain              | Developing     |
| BHS          |     | Bahamas              | Developing     |

|     |                                      |                |
|-----|--------------------------------------|----------------|
| BIH | Bosnia and Herzegovina               | Industrialised |
| BLR | Belarus                              | Industrialised |
| BLZ | Belize                               | Developing     |
| BMU | Bermuda                              | Developing     |
| BOL | Bolivia                              | Developing     |
| BRA | Brazil                               | Developing     |
| BRB | Barbados                             | Developing     |
| BRN | Brunei Darussalam                    | Developing     |
| BTN | Bhutan                               | Developing     |
| BWA | Botswana                             | Developing     |
| CAF | Central African Republic             | Developing     |
| CAN | Canada                               | Industrialised |
| CHE | Switzerland                          | Industrialised |
| CHL | Chile                                | Developing     |
| CHN | China                                | Developing     |
| CIV | Cote d'Ivoire                        | Developing     |
| CMR | Cameroon                             | Developing     |
| COD | Congo_the Democratic Republic of the | Developing     |
| COG | Congo                                | Developing     |
| COK | Cook Islands                         | Developing     |
| COL | Colombia                             | Developing     |
| COM | Comoros                              | Developing     |
| CPV | Cape Verde                           | Developing     |
| CRI | Costa Rica                           | Developing     |
| CUB | Cuba                                 | Developing     |
| CYM | Cayman Islands                       | Developing     |
| CYP | Cyprus                               | Industrialised |
| CZE | Czech Republic                       | Industrialised |

|     |                                 |                |
|-----|---------------------------------|----------------|
| DEU | Germany                         | Industrialised |
| DJI | Djibouti                        | Developing     |
| DMA | Dominica                        | Developing     |
| DNK | Denmark                         | Industrialised |
| DOM | Dominican Republic              | Developing     |
| DZA | Algeria                         | Developing     |
| ECU | Ecuador                         | Developing     |
| EGY | Egypt                           | Developing     |
| ERI | Eritrea                         | Developing     |
| ESH | Western Sahara                  | Developing     |
| ESP | Spain                           | Industrialised |
| EST | Estonia                         | Industrialised |
| ETH | Ethiopia                        | Developing     |
| FIN | Finland                         | Industrialised |
| FJI | Fiji                            | Developing     |
| FLK | Falkland Islands (Malvinas)     | Developing     |
| FRA | France                          | Industrialised |
| FRO | Faroe Islands                   | Industrialised |
| FSM | Micronesia, Federated States of | Developing     |
| GAB | Gabon                           | Developing     |
| GBR | United Kingdom                  | Industrialised |
| GEO | Georgia                         | Industrialised |
| GHA | Ghana                           | Developing     |
| GIB | Gibraltar                       | Industrialised |
| GIN | Guinea                          | Developing     |
| GLP | Guadeloupe                      | Developing     |
| GMB | Gambia                          | Developing     |
| GNB | Guinea-Bissau                   | Developing     |

|     |                           |                |
|-----|---------------------------|----------------|
| GNQ | Equatorial Guinea         | Developing     |
| GRC | Greece                    | Industrialised |
| GRD | Grenada                   | Developing     |
| GRL | Greenland                 | Industrialised |
| GTM | Guatemala                 | Developing     |
| GUF | French Guiana             | Developing     |
| GUM | Guam                      | Developing     |
| GUY | Guyana                    | Developing     |
| HKG | Hong Kong                 | Developing     |
| HND | Honduras                  | Developing     |
| HRV | Croatia                   | Industrialised |
| HTI | Haiti                     | Developing     |
| HUN | Hungary                   | Industrialised |
| IDN | Indonesia                 | Developing     |
| IND | India                     | Developing     |
| IRL | Ireland                   | Industrialised |
| IRN | Iran, Islamic Republic of | Developing     |
| IRQ | Iraq                      | Developing     |
| ISL | Iceland                   | Industrialised |
| ISR | Israel                    | Developing     |
| ITA | Italy                     | Industrialised |
| JAM | Jamaica                   | Developing     |
| JOR | Jordan                    | Developing     |
| JPN | Japan                     | Industrialised |
| KAZ | Kazakhstan                | Industrialised |
| KEN | Kenya                     | Developing     |
| KGZ | Kyrgyzstan                | Industrialised |
| KHM | Cambodia                  | Developing     |

|     |                                            |                |
|-----|--------------------------------------------|----------------|
| KIR | Kiribati                                   | Developing     |
| KNA | Saint Kitts and Nevis                      | Developing     |
| KOR | Korea, Republic of                         | Industrialised |
| KWT | Kuwait                                     | Developing     |
| LAO | Lao People's Democratic Republic           | Developing     |
| LBN | Lebanon                                    | Developing     |
| LBR | Liberia                                    | Developing     |
| LBY | Libyan Arab Jamahiriya                     | Developing     |
| LCA | Saint Lucia                                | Developing     |
| LKA | Sri Lanka                                  | Developing     |
| LSO | Lesotho                                    | Developing     |
| LTU | Lithuania                                  | Industrialised |
| LUX | Luxembourg                                 | Industrialised |
| LVA | Latvia                                     | Industrialised |
| MAC | Macao                                      | Developing     |
| MAR | Morocco                                    | Developing     |
| MDA | Moldova, Republic of                       | Industrialised |
| MDG | Madagascar                                 | Developing     |
| MDV | Maldives                                   | Developing     |
| MEX | Mexico                                     | Industrialised |
| MHL | Marshall Islands                           | Developing     |
| MKD | Macedonia, the former Yugoslav Republic of | Industrialised |
| MLI | Mali                                       | Developing     |
| MLT | Malta                                      | Industrialised |
| MMR | Myanmar                                    | Developing     |
| MNG | Mongolia                                   | Developing     |
| MNP | Northern Mariana Islands                   | Developing     |
| MOZ | Mozambique                                 | Developing     |

|     |                  |                |
|-----|------------------|----------------|
| MRT | Mauritania       | Developing     |
| MSR | Montserrat       | Developing     |
| MTQ | Martinique       | Developing     |
| MUS | Mauritius        | Developing     |
| MWI | Malawi           | Developing     |
| MYS | Malaysia         | Developing     |
| MYT | Mayotte          | Developing     |
| NAM | Namibia          | Developing     |
| NCL | New Caledonia    | Developing     |
| NER | Niger            | Developing     |
| NFK | Norfolk Island   | Developing     |
| NGA | Nigeria          | Developing     |
| NIC | Nicaragua        | Developing     |
| NIU | Niue             | Developing     |
| NLD | Netherlands      | Industrialised |
| NOR | Norway           | Industrialised |
| NPL | Nepal            | Developing     |
| NRU | Nauru            | Developing     |
| NZL | New Zealand      | Industrialised |
| OMN | Oman             | Developing     |
| PAK | Pakistan         | Developing     |
| PAN | Panama           | Developing     |
| PER | Peru             | Developing     |
| PHL | Philippines      | Developing     |
| PLW | Palau            | Developing     |
| PNG | Papua New Guinea | Developing     |
| POL | Poland           | Industrialised |
| PRI | Puerto Rico      | Developing     |

|     |                                        |                |
|-----|----------------------------------------|----------------|
| PRK | Korea, Democratic People's Republic of | Developing     |
| PRT | Portugal                               | Industrialised |
| PRY | Paraguay                               | Developing     |
| PYF | French Polynesia                       | Developing     |
| QAT | Qatar                                  | Developing     |
| REU | Reunion                                | Developing     |
| ROU | Romania                                | Industrialised |
| RUS | Russian Federation                     | Industrialised |
| RWA | Rwanda                                 | Developing     |
| SAU | Saudi Arabia                           | Developing     |
| SCG | Serbia and Montenegro                  | Industrialised |
| SDN | Sudan                                  | Developing     |
| SEA | Int. Shipping                          | 0              |
| SEN | Senegal                                | Developing     |
| SGP | Singapore                              | Developing     |
| SHN | Saint Helena                           | Developing     |
| SLB | Solomon Islands                        | Developing     |
| SLE | Sierra Leone                           | Developing     |
| SLV | El Salvador                            | Developing     |
| SOM | Somalia                                | Developing     |
| SPM | Saint Pierre and Miquelon              | Industrialised |
| STP | Sao Tome and Principe                  | Developing     |
| SUR | Suriname                               | Developing     |
| SVK | Slovakia                               | Industrialised |
| SVN | Slovenia                               | Industrialised |
| SWE | Sweden                                 | Industrialised |
| SWZ | Swaziland                              | Developing     |
| SYC | Seychelles                             | Developing     |



|     |                                  |                |
|-----|----------------------------------|----------------|
| SYR | Syrian Arab Republic             | Developing     |
| TCA | Turks and Caicos Islands         | Developing     |
| TCD | Chad                             | Developing     |
| TGO | Togo                             | Developing     |
| THA | Thailand                         | Developing     |
| TJK | Tajikistan                       | Industrialised |
| TKL | Tokelau                          | Developing     |
| TKM | Turkmenistan                     | Industrialised |
| TLS | Timor-Leste                      | Developing     |
| TON | Tonga                            | Developing     |
| TTO | Trinidad and Tobago              | Developing     |
| TUN | Tunisia                          | Developing     |
| TUR | Turkey                           | Industrialised |
| TUV | Tuvalu                           | Developing     |
| TWN | Taiwan_Province of China         | Developing     |
| TZA | Tanzania_United Republic of      | Developing     |
| UGA | Uganda                           | Developing     |
| UKR | Ukraine                          | Industrialised |
| URY | Uruguay                          | Developing     |
| USA | United States                    | Industrialised |
| UZB | Uzbekistan                       | Industrialised |
| VCT | Saint Vincent and the Grenadines | Developing     |
| VEN | Venezuela                        | Developing     |
| VGB | Virgin Islands_British           | Developing     |
| VIR | Virgin Islands_USA               | Developing     |
| VNM | Viet Nam                         | Developing     |
| VUT | Vanuatu                          | Developing     |
| WLF | Wallis and Futuna                | Developing     |

|     |              |            |
|-----|--------------|------------|
| WSM | Samoa        | Developing |
| YEM | Yemen        | Developing |
| ZAF | South Africa | Developing |
| ZMB | Zambia       | Developing |
| ZWE | Zimbabwe     | Developing |

**The EU27 comprises:** Austria, Italy, Belgium, Latvia, Bulgaria, Lithuania, Croatia, Luxembourg, Cyprus, Malta, Czechia, The Netherlands, Denmark, Poland, Estonia, Portugal, Finland, Romania, France, Slovakia, Germany, Slovenia, Greece, Spain, Hungary, Sweden, Ireland.

**OECD comprises:** Australia, Austria, Belgium, Canada, Chile, Colombia, Czech Republic, Denmark, Estonia, Finland, France, Germany, Greece, Hungary, Iceland, Ireland, Israel, Italy, Japan, Korea, Latvia, Lithuania, Luxembourg, Mexico, Netherlands, New Zealand, Norway, Poland, Portugal, Slovak Republic, Slovenia, Spain, Sweden, Switzerland, Turkey, United Kingdom, United States.
